# Supplementary material for: American Christian Engagement With Mental Health and Mental Illness
Source: Atypon-hosted journal article supplement (doi:10.1176/appi.ps.201400542), 2015-09-15
Supplement: appi.ps.201400542.ds001.pdf [file appi.ps.201400542.ds001.pdf]

Table 1. Overview of American Christian Engagements with Mental Health and Mental Illness

| Name of Movement             | Key Themes                                                                                                                                                                                            | Professional and Academic Organizations                                                                                                                                          | Central Educational Institutions/Movements                                                                                                                                                                                           | Clinical and Academic Journals                                                                                                                                           |
|------------------------------|-------------------------------------------------------------------------------------------------------------------------------------------------------------------------------------------------------|----------------------------------------------------------------------------------------------------------------------------------------------------------------------------------|--------------------------------------------------------------------------------------------------------------------------------------------------------------------------------------------------------------------------------------|--------------------------------------------------------------------------------------------------------------------------------------------------------------------------|
| Pastoral Care and Counseling | Usually supportive of medical models of mental illness and of modern mental health care delivery systems.<br><br>Often associated with mental health advocacy efforts and/or church policy statements | Association for Clinical Pastoral Education<br><br>Association of Professional Chaplains<br><br>American Association of Pastoral Counselors<br><br>Society for Pastoral Theology | Clinical Pastoral Education programs in many medical centers                                                                                                                                                                         | <i>Journal of Pastoral Care and Counseling</i><br><br><i>Pastoral Psychology</i><br><br><i>Journal of Pastoral Theology</i><br><br><i>Journal of Religion and Health</i> |
| Biblical Counseling          | Directive approach to counseling rooted in the moral authority of the Bible, the role of the pastor as counselor, and the discovery and confession of human sin.                                      | Institute for Nouthetic Studies<br><br>Association of Certified Biblical Counselors<br><br>Association of Biblical Counselors                                                    | Christian Counseling and Educational Foundation, associated with Westminster Theological Seminary, Philadelphia, PA                                                                                                                  | <i>Journal of Biblical Counseling</i>                                                                                                                                    |
| Integrationism               | Linked to clinical psychology research methods and training programs.<br><br>Combines commitment to the usefulness of psychological research with commitment to the moral authority of the Bible.     | Christian Association of Psychological Studies<br><br>American Association of Christian Counselors<br><br>Psychiatry Section of the Christian Medical Association                | Fuller School of Psychology, Fuller Theological Seminary, CA<br><br>Rosemead School of Psychology, Biola University, CA<br><br>Numerous other APA-accredited PhD and PsyD training programs<br><br>Masters-level counseling programs | <i>Journal of Psychology and Theology</i><br><br><i>Journal of Psychology and Christianity</i>                                                                           |
| Christian Psychology         | Transdisciplinary movement seeking to engage psychology and psychiatry from the perspective of Christian theology and history                                                                         | Society for Christian Psychology                                                                                                                                                 |                                                                                                                                                                                                                                      | <i>Christian Psychology</i>                                                                                                                                              |
| Catholic-oriented approaches | Seeks a distinctively Catholic approach to psychological theory and practice, rooted in Catholic moral theology and Catholic teaching                                                                 | none                                                                                                                                                                             | Institute for the Psychological Sciences, Arlington, VA                                                                                                                                                                              | IPS Book Series                                                                                                                                                          |
